# Supplementary material for: Tandem dispersion and killing of bacteria from a biofilm
Source: Royal Society of Chemistry journal article supplement (doi:10.1039/b817923a), 2008-12-10
Supplement: b817923a.pdf [file b817923a.pdf]

Supplementary Information

**Tandem Dispersion and Killing of Bacteria from a Biofilm**

Steven A. Rogers, Michael Krayer, Jonathan S. Lindsey and Christian Melander

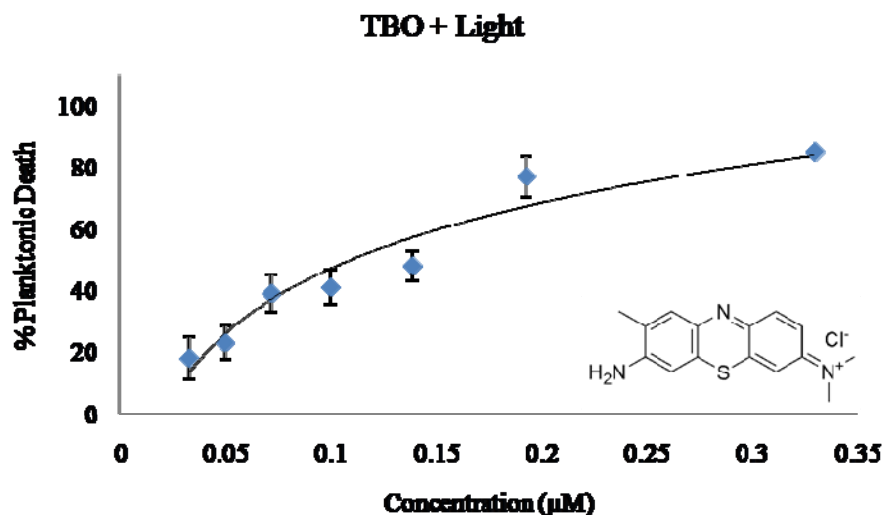

**Figure S1.** Percent planktonic death of *A. baumannii* as a function of TBO concentration upon illumination. The data are fit with a logarithmic curve. Error bars are constructed from the standard deviations from at least three assays.

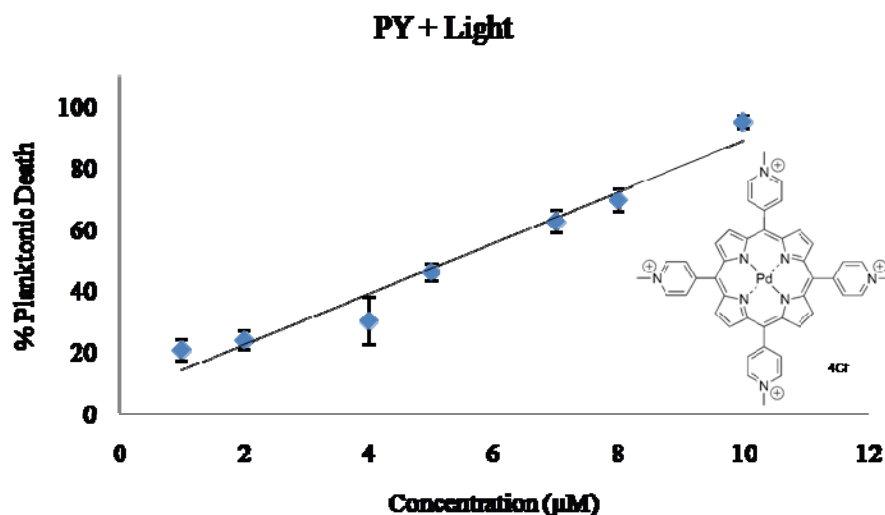

**Figure S2.** Percent planktonic death of *A. baumannii* as a function of PY concentration upon illumination. The data are fit with a linear trend line. Error bars are constructed from the standard deviations from at least three assays.

**Figure S3.** Effect of TBO (33 µM) on planktonic *A. baumannii* without illumination versus a control with no TBO. Error bars are constructed from the standard deviations from at least three assays.

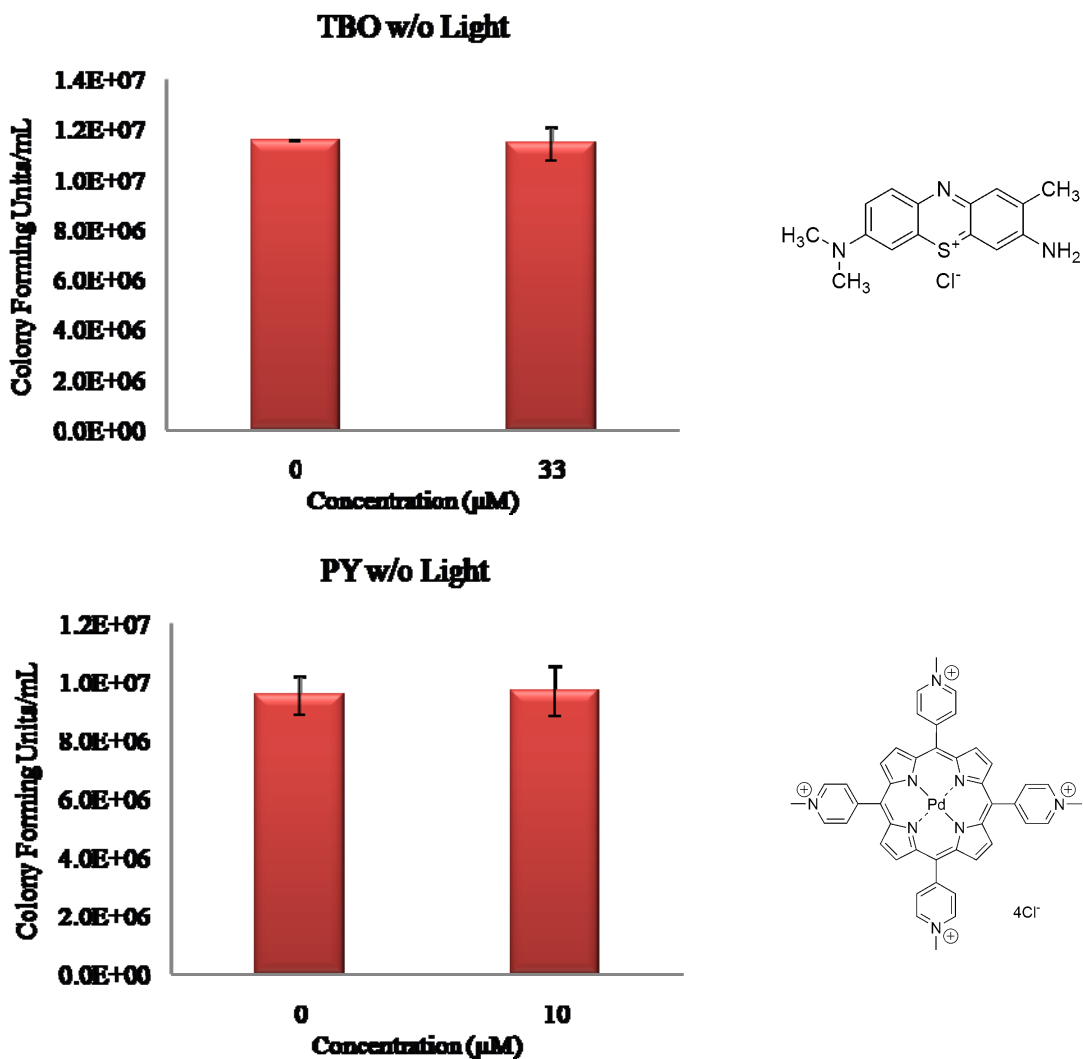

Figure S4. Effect of PY (10  $\mu\text{M}$ ) on planktonic *A. baumannii* without illumination versus a control with no PY. Error bars are constructed from the standard deviations from at least three assays.

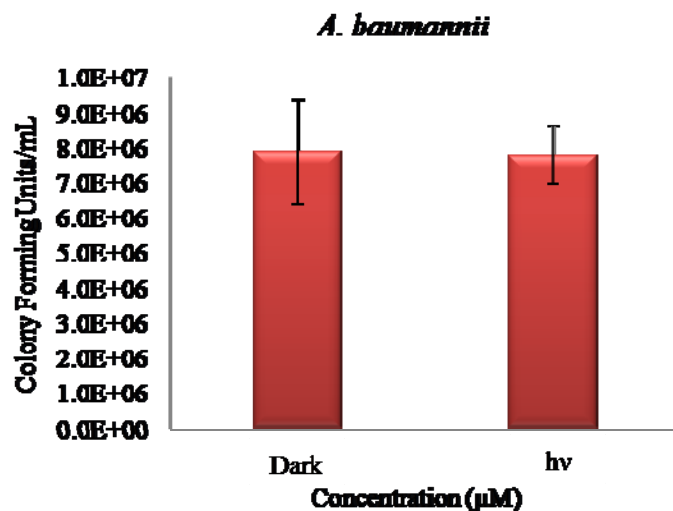

**Figure S5.** Effects of illumination on the viability of planktonic *A. baumannii*. Error bars are constructed from the standard deviations from at least three assays.

**Table S1.** Dose-response of TBO to the dispersion of *A. baumannii* biofilms.

| Conc. of TBO (μM) | % Dispersion |
|-------------------|--------------|
| 0.10              | none         |
| 1.0               | none         |
| 10.0              | none         |

**Table S2.** Dose-response of PY to the dispersion of *A. baumannii* biofilms.

| Conc. of PY (μM) | % Dispersion |
|------------------|--------------|
| 0.10             | none         |
| 1.0              | none         |
| 10.0             | none         |

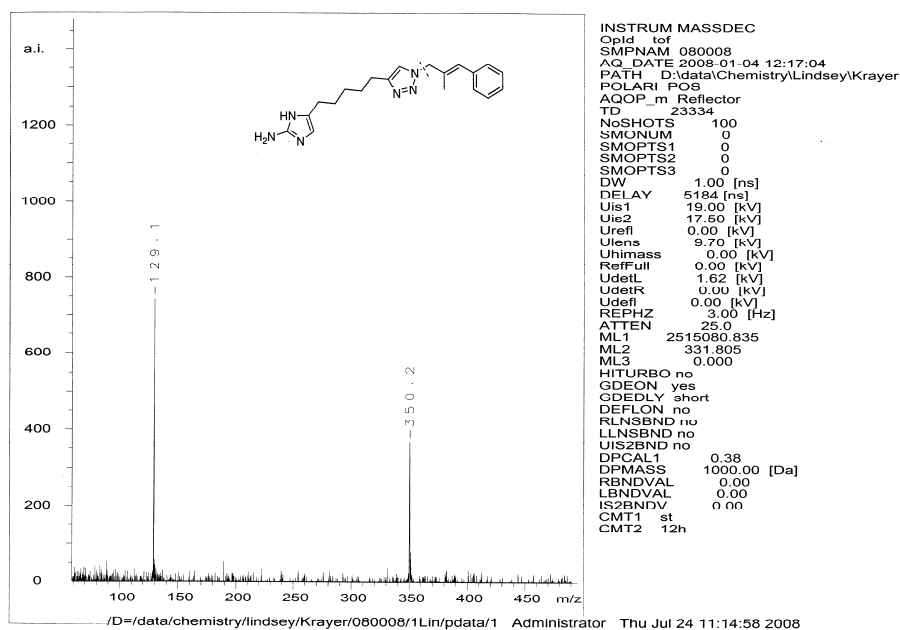

Figure S6. LD-MS of anti-biofilm agent (1) obsd 350.2, calcd 350.2 ( $C_{20}H_{26}N_6$ ).

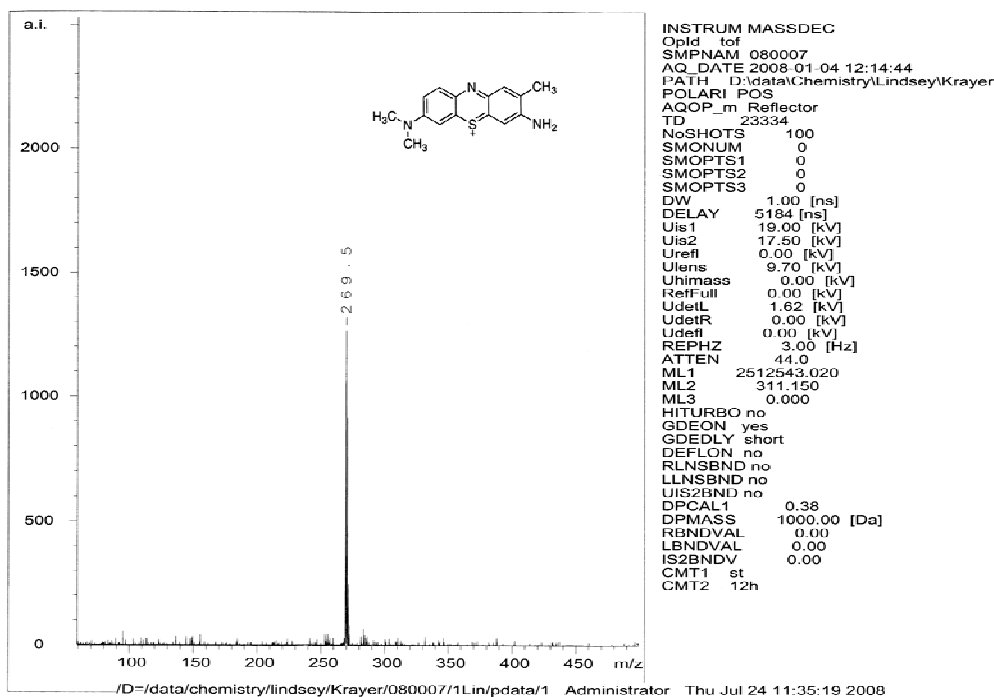

Figure S7. LD-MS of TBO obsd 269.5, calcd 270.1 ( $C_{15}H_{16}N_3S^+$ ).

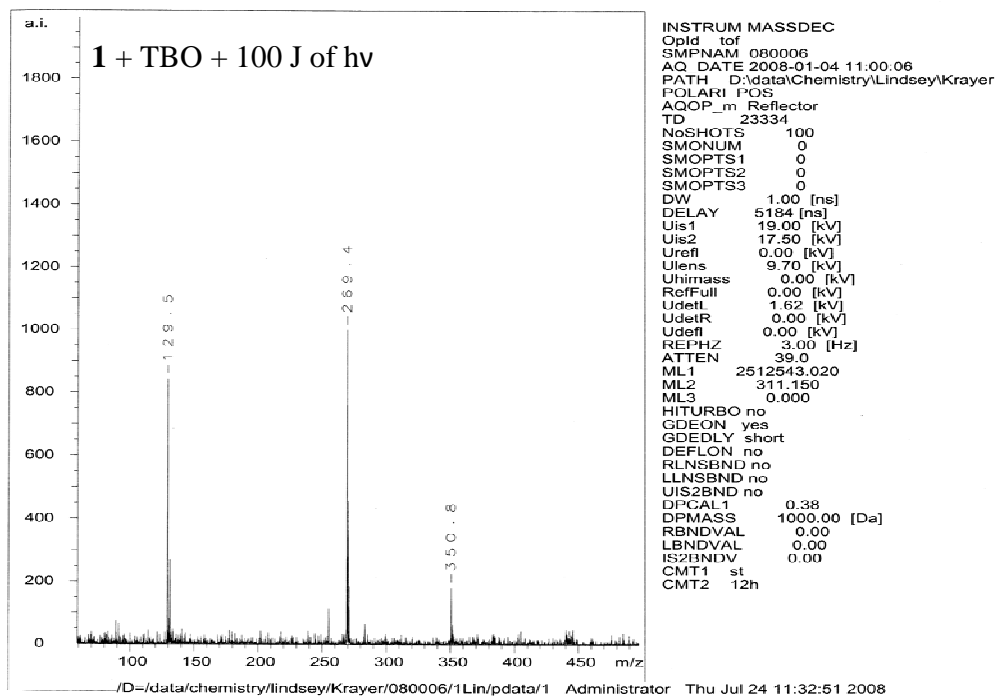

**Figure S8.** LD-MS of **1** + TBO after irradiation with 100 J ( $80 \text{ mW/cm}^2$ , 20 min,  $\lambda_{\text{irr}} = 400\text{--}700 \text{ nm}$ ).

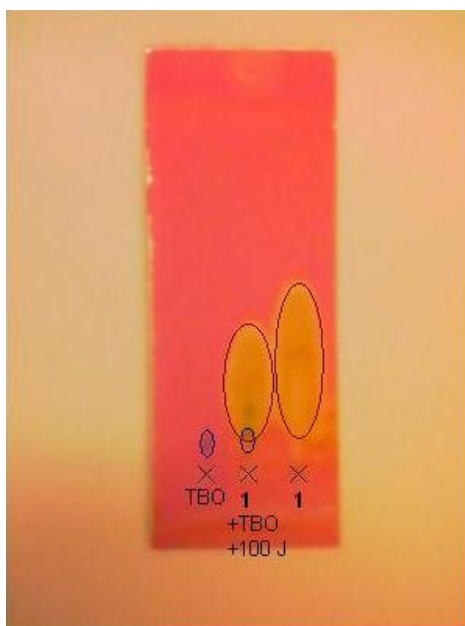

**Figure S9.** TLC of TBO (left lane), anti-biofilm agent (**1**) (right lane) and **1** + TBO after irradiation with 100 J ( $80 \text{ mW/cm}^2$ , 20 min,  $\lambda_{\text{irr}} = 400\text{--}700 \text{ nm}$ ), stained with  $\text{KMnO}_4$  for visualization.

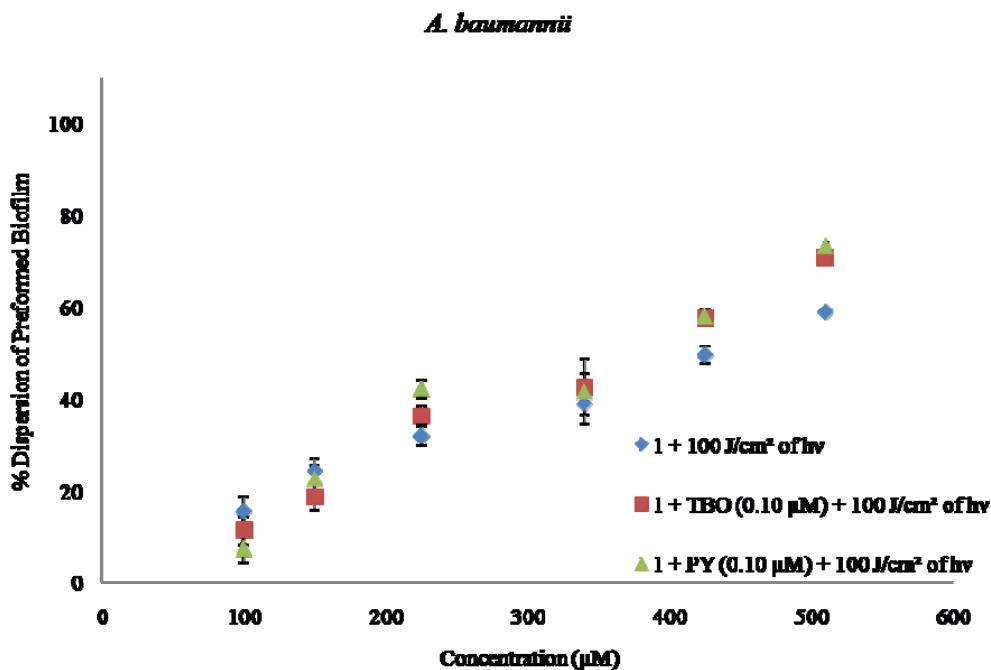

**Figure S10.** Dispersion dose-response data for 0.10 µM PDI agent solutions containing variable concentrations of **1**. Error bars are constructed from the standard deviations from at least three assays.

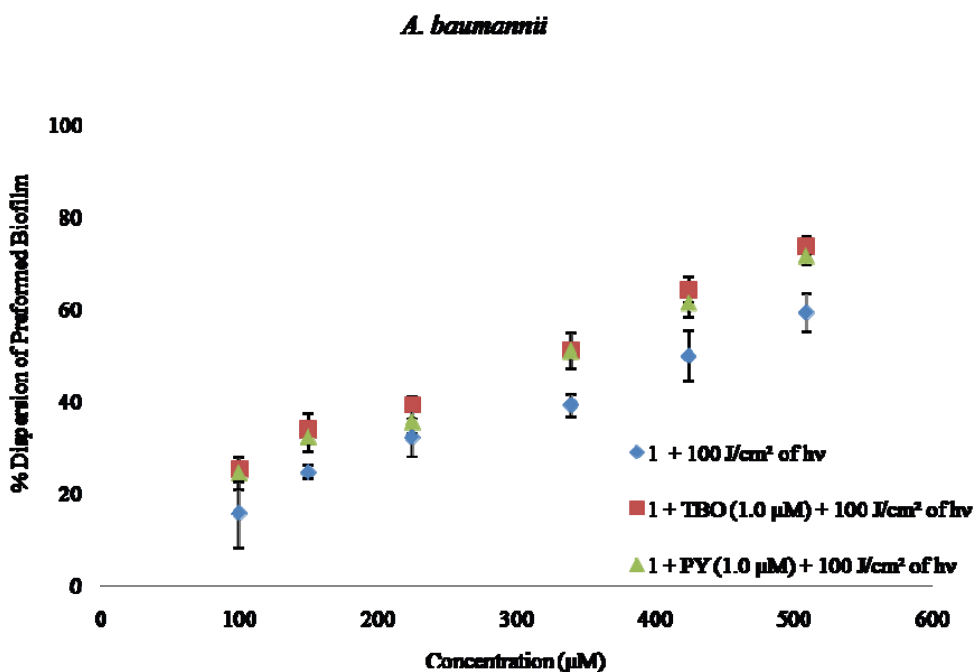

**Figure S11.** Dispersion dose-response data for 1.0 µM PDI agent solutions containing variable concentrations of **1**. Error bars are constructed from the standard deviations from at least three assays.

*A. baumannii*

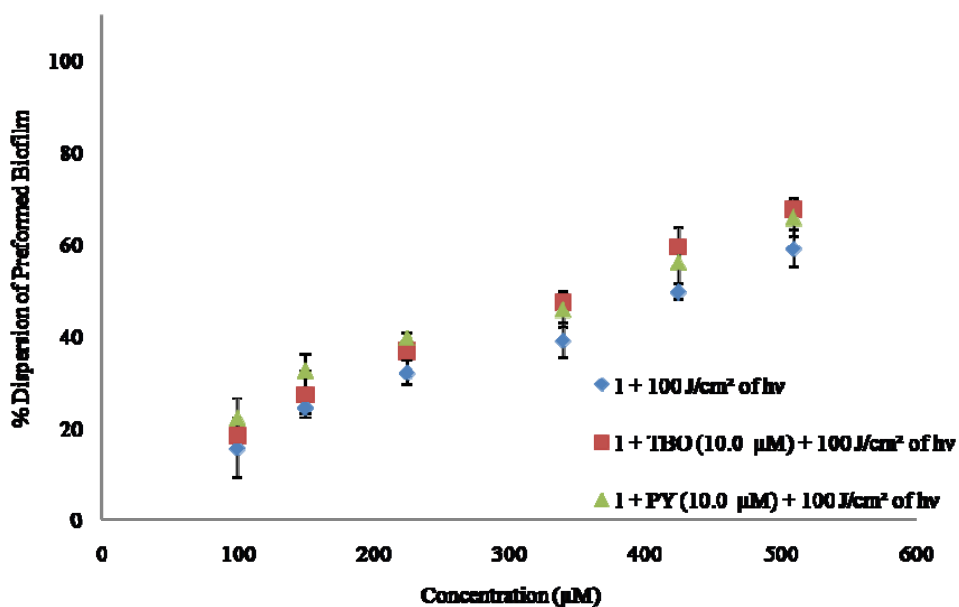

**Figure S12.** Dispersion dose-response data for 10.0 µM PDI agent solutions containing variable concentrations of **1**. Error bars are constructed from the standard deviations from at least three assays.
